# Supplementary material for: A real time colorimetric ‘two in one’ kit for tracking ppb levels of uric acid and Hg2+ in live HeLa S3 cells and Hg2+ induced keto–enol tautomerism
Source: Royal Society of Chemistry journal article supplement (doi:10.1039/c6ra06987h), 2016-01-01
Supplement: c6ra06987h1.pdf [file c6ra06987h1.pdf]

# **A real time colorimetric ‘two in one’ kit for tracking ppb level of uric acid and Hg<sup>2+</sup> in live HeLa S3 cell and Hg<sup>2+</sup> induced ‘keto-enol’ tautomerism**

Chanda Kumari, Dibyendu Sain, Ashish Kumar, Sushanta Debnath, Partha Saha and Swapan Dey\*

| <b>Table of content</b>                                                  | <b>Page No.</b> |
|--------------------------------------------------------------------------|-----------------|
| <b>Crystal structure and Crystallographic data for RNpd1</b>             | <b>2</b>        |
| <b>Characteristic experimental spectra (NMR, mass and IR spectra)</b>    | <b>3-13</b>     |
| <b>Visual colour change of RNpd1 with different metal ions</b>           | <b>14</b>       |
| <b>Binding constant calculation by UV-Vis and fluorescence titration</b> | <b>15-18</b>    |
| <b>Comparision of Fluorescence specetra of coomp B and Rhodamine B.</b>  | <b>19</b>       |
| <b>Competitive FL specetra of RNpd1 with UA and other biomolecules</b>   | <b>19</b>       |
| <b>Quantum yield calculation</b>                                         | <b>20</b>       |
| <b>Calculation of limit of detection (LOD)</b>                           | <b>20-22</b>    |
| <b>Bar diagram of RNpd1 with different metal ions and Uric acid</b>      | <b>22</b>       |
| <b>Influence of pH in absorbance of RNpd1</b>                            | <b>23</b>       |
| <b>Reversibility of RNpd1:Hg<sup>2+</sup> complex with EDTA.</b>         | <b>23</b>       |

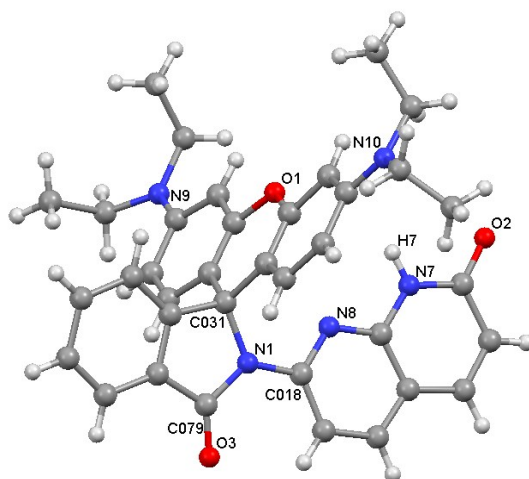

**Fig. S1** Crystal structure of **RNpd1**

**Table S1: Crystallographic data for RNpd1**

|                                                   | <b>RNpd1</b>                                                                          |
|---------------------------------------------------|---------------------------------------------------------------------------------------|
| CCDC No.                                          | <b>1420224</b>                                                                        |
| Formula:                                          | $C_{36}H_{35}N_3O_3$                                                                  |
| Formula Weight:                                   | 585.6948                                                                              |
| Crystal System:                                   | Triclinic                                                                             |
| Space group:                                      | P -1 (2)                                                                              |
| a, b, c [Å]:                                      | 16.9751(5), 20.3272(6), 120.5345(6)                                                   |
| $\alpha, \beta, \gamma$ (°):                      | $\alpha = 90.308^\circ(2)$ , $\beta = 105.442^\circ(3)$ , $\gamma = 107.538^\circ(3)$ |
| V [Å] <sup>3</sup> :                              | 6484.0(4)                                                                             |
| Z:                                                | 8                                                                                     |
| D(calc) [g/cm <sup>3</sup> ]:                     | 1.001                                                                                 |
| $\mu$ (Mo-K $\alpha$ ) [mm <sup>-1</sup> ]:       | 0.078                                                                                 |
| F(000):                                           | 2464                                                                                  |
| Crystal Size [mm]:                                | 0.16 x 0.14 x 0.10                                                                    |
| Temperature (K):                                  | 293(2)                                                                                |
| Radiation [Å]: Mo-K $\alpha$                      | 0.71073                                                                               |
| $\theta_{\text{Min-Max}}$ [°]:                    | 2.712, 27.000                                                                         |
| Dataset:                                          | -21 ≤ h ≤ 21<br>-17 ≤ k ≤ 25<br>-25 ≤ l ≤ 26                                          |
| Tot., Uniq. Data, R(int):                         | 52977, 18598, 0.1358                                                                  |
| Observed data [I > 2.0 $\sigma$ (I)]              | 27747                                                                                 |
| Refinement: N <sub>ref</sub> , N <sub>par</sub> : | 27747, 1585                                                                           |
| R, wR2, S:                                        | 0.1032, 0.2939, 1.035                                                                 |
| Max. & Av. Shift/Error:                           | 0.014, 0.001                                                                          |
| Min. & Max. Resd. Dens. [e/ Å <sup>3</sup> ]:     | -0.355, 1.001.                                                                        |

# <sup>1</sup>H-NMR spectrum of Comp A in d<sub>6</sub>-DMSO

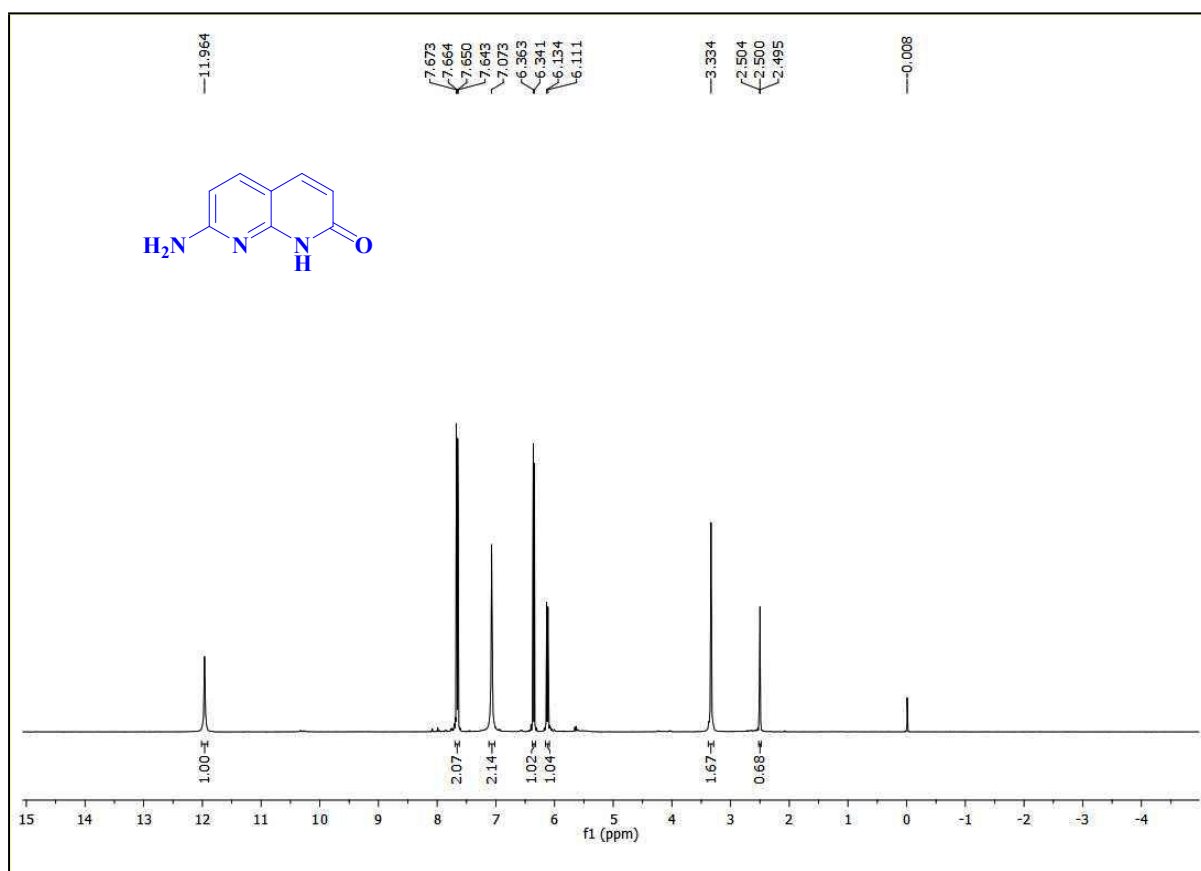

**$^{13}\text{C}$ -NMR spectrum of RNpd1 in  $\text{CDCl}_3$**

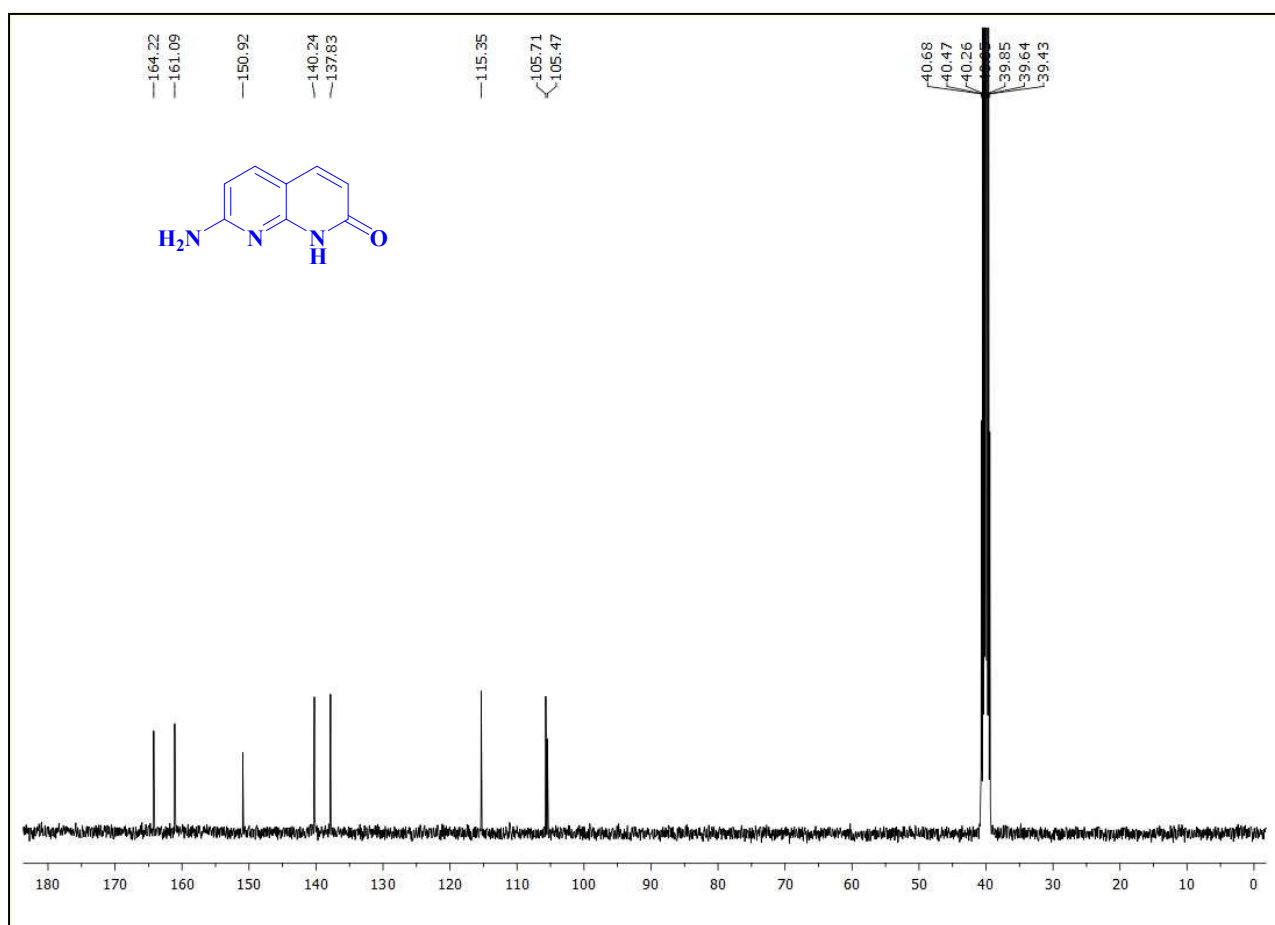

## Mass Spectra of comp A

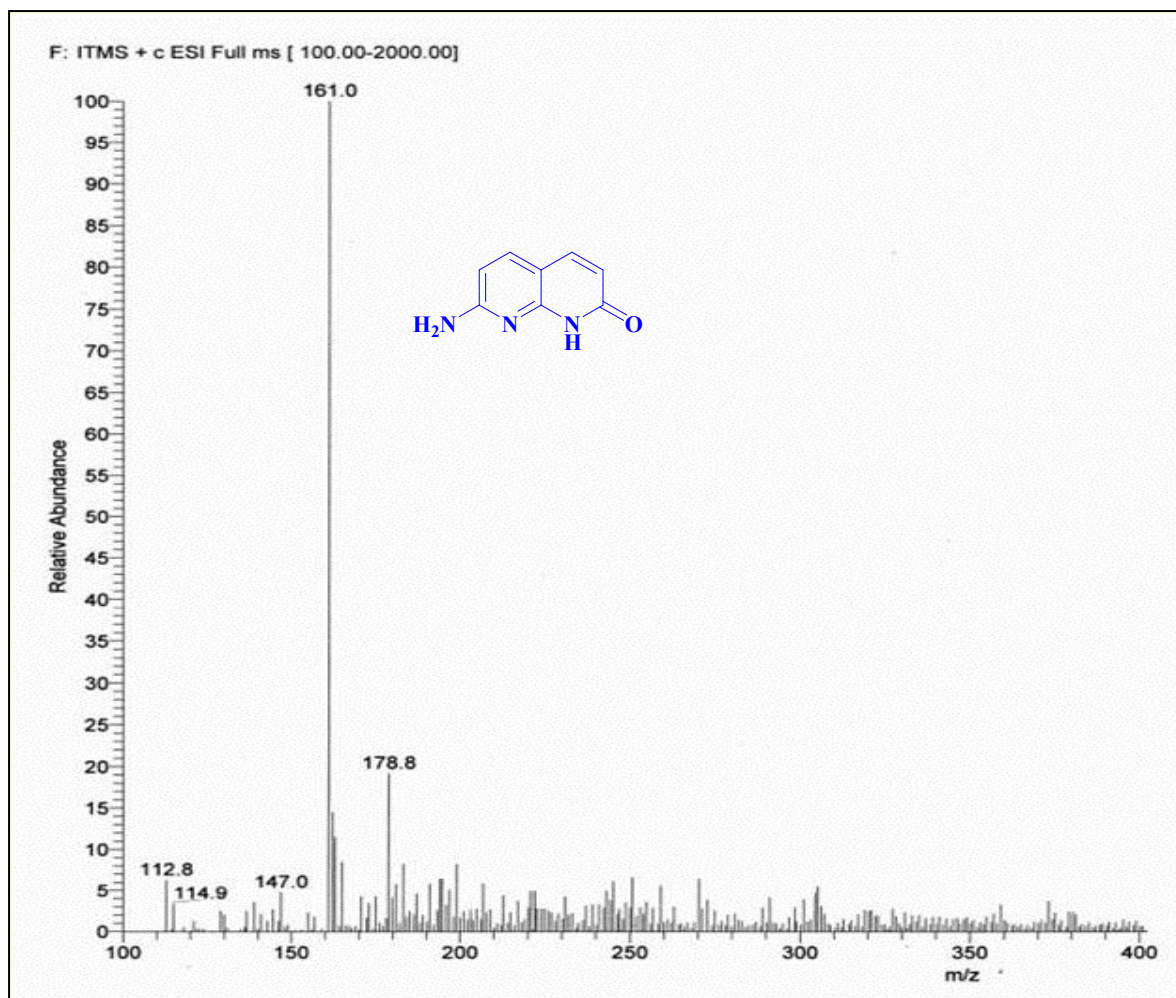

**<sup>1</sup>H-NMR spectrum of Comp B in CDCl<sub>3</sub>:**

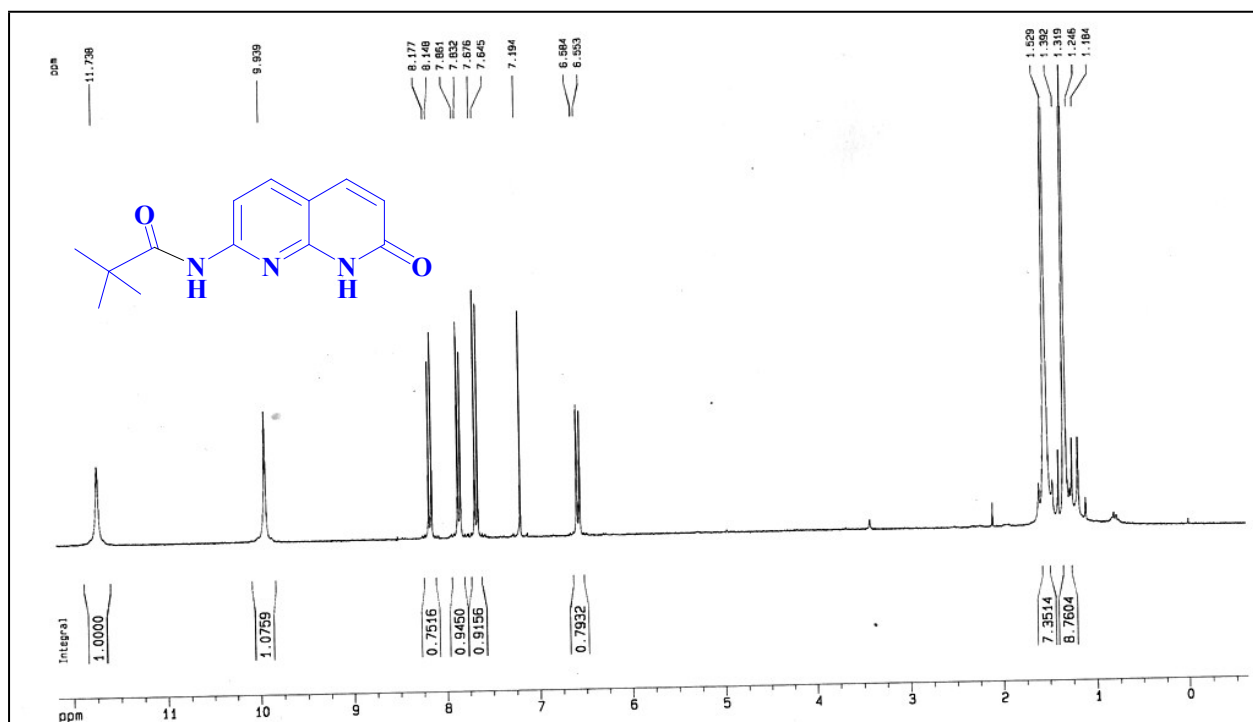

**<sup>1</sup>H-NMR spectrum of RNpd1 in CDCl<sub>3</sub>**

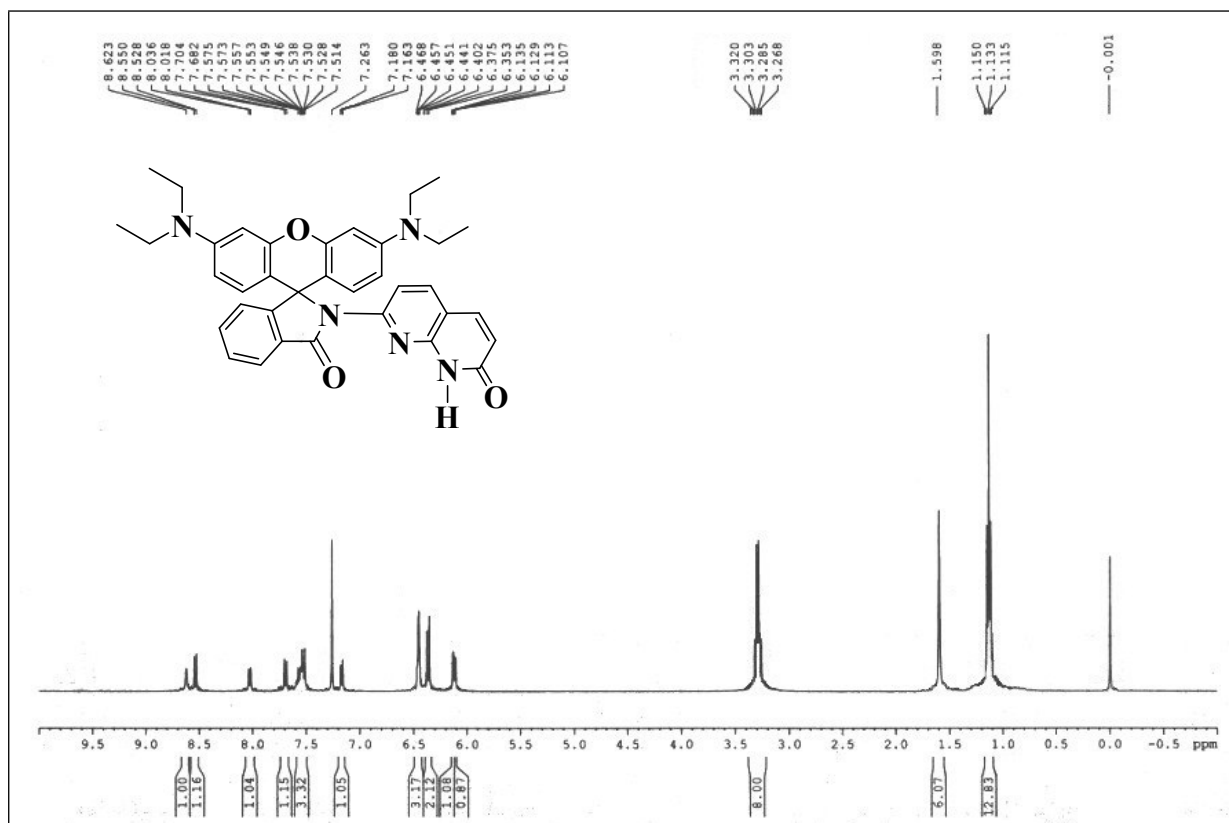

Chemical structure of compound 10 is shown above the spectrum. The spectrum displays peaks from 0.0 to 11.0 ppm. Integration values are provided below the baseline: 1.00, 1.10, 1.11, 1.05, 2.29, 1.06, 2.08, 1.11, 2.11, 2.14, 9.47, and 12.61. Chemical shifts (delta) are labeled above the peaks: 8.811, 8.015, 7.994, 7.733, 7.715, 7.693, 7.671, 7.509, 7.485, 7.399, 7.380, 7.360, 7.340, 6.967, 6.906, 6.889, 6.873, 6.130, 6.105, 6.083, 5.937, 5.911, 5.915, 5.909, 3.080, 3.069, 3.045, 3.026, 0.871, 0.854, and 0.836.

**$^1\text{H}$ -NMR spectrum of RNpd1:Hg<sup>2+</sup> in CDCl<sub>3</sub> (Expansion) (Keto-enol tautomerism)**

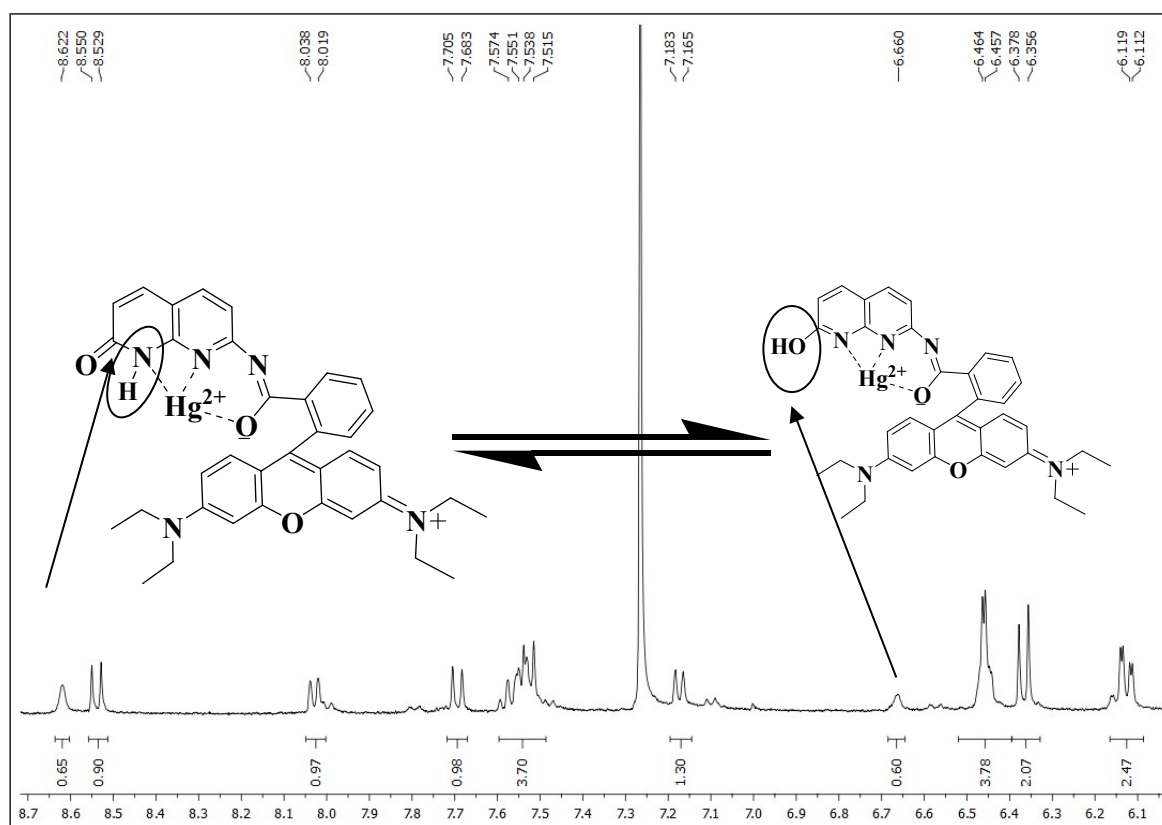

**$^1\text{H}$ -NMR spectrum of RNpd1:UA in d<sub>6</sub>-DMSO**

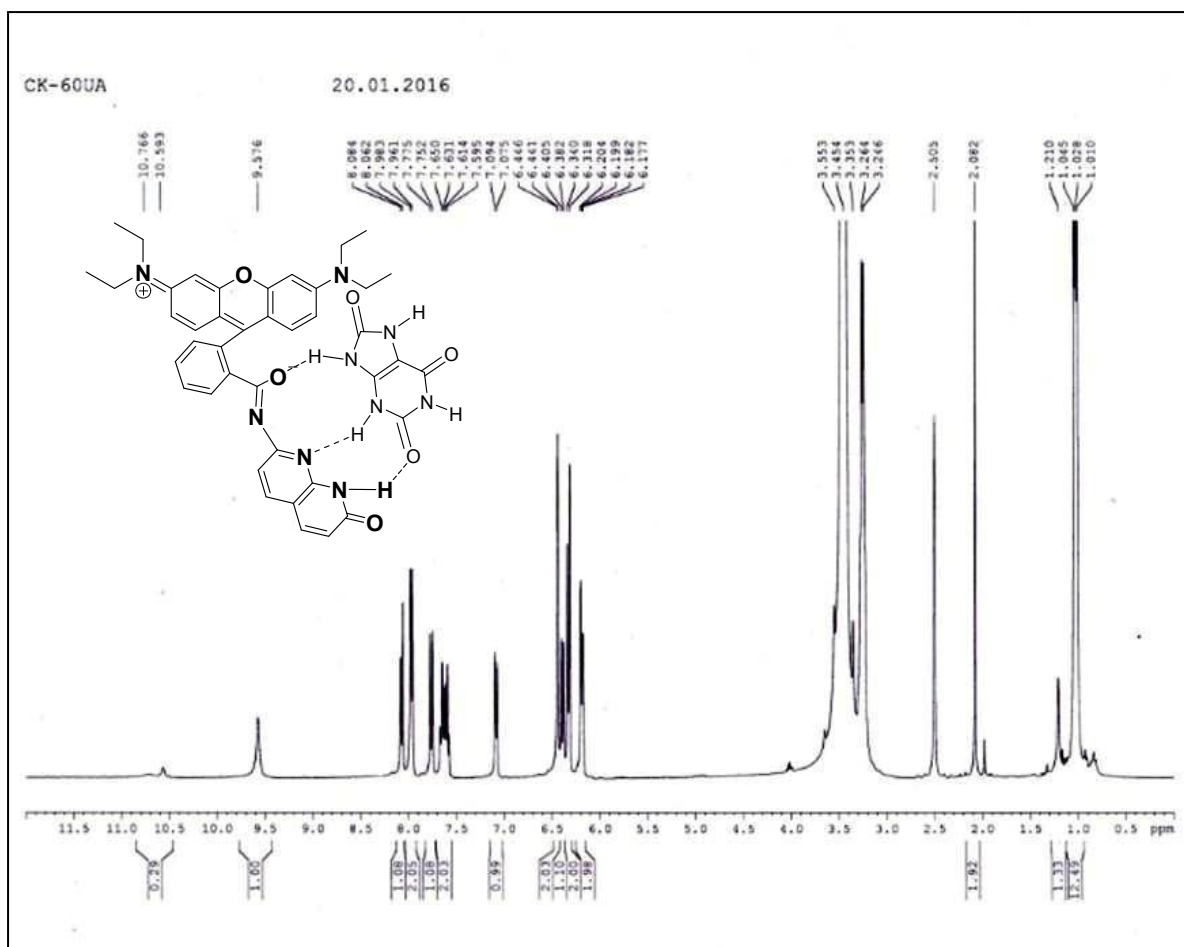

$^{13}\text{C}$ -NMR spectrum of RNpd1 in  $\text{CDCl}_3$

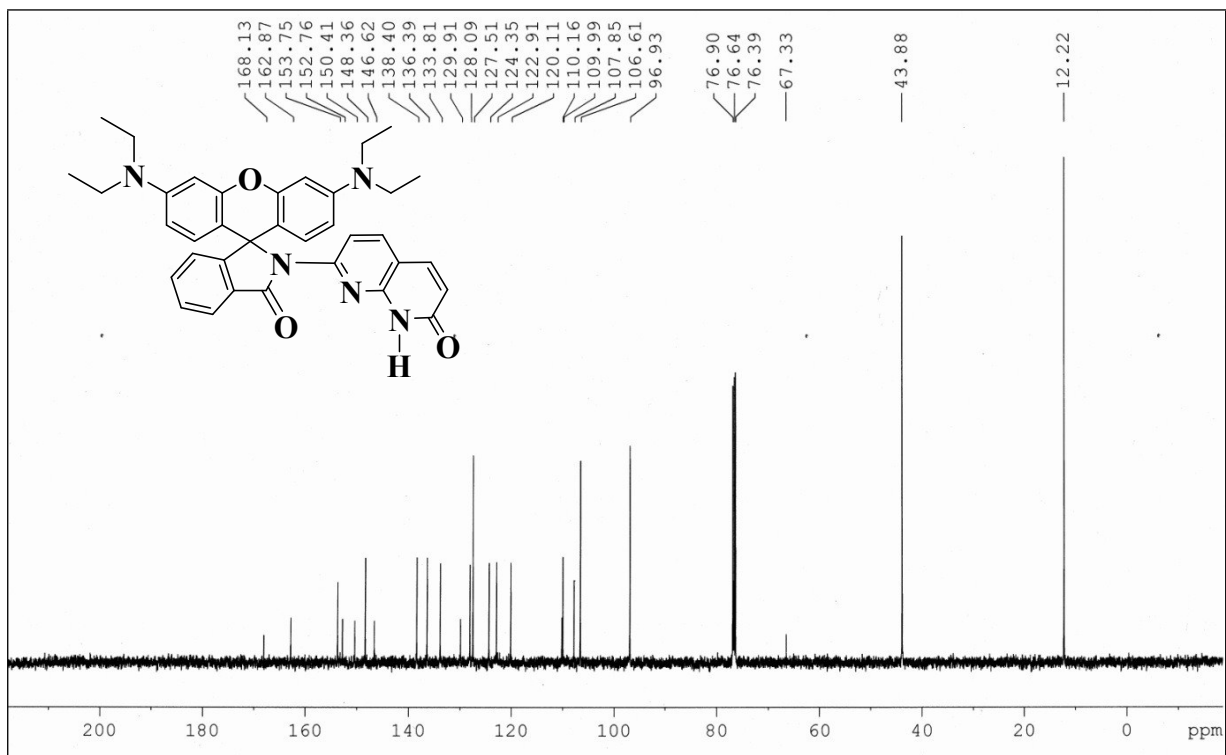

## IR spectrum of RNpd1

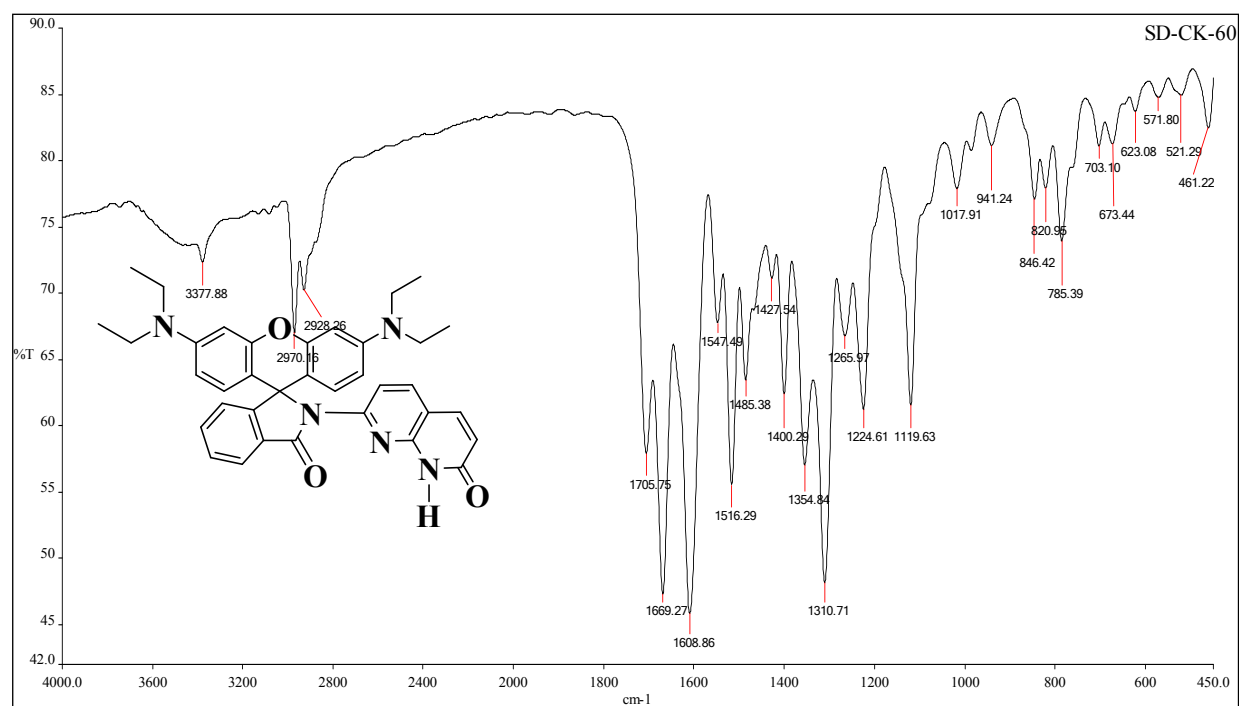

## Mass spectrum of RNpd1

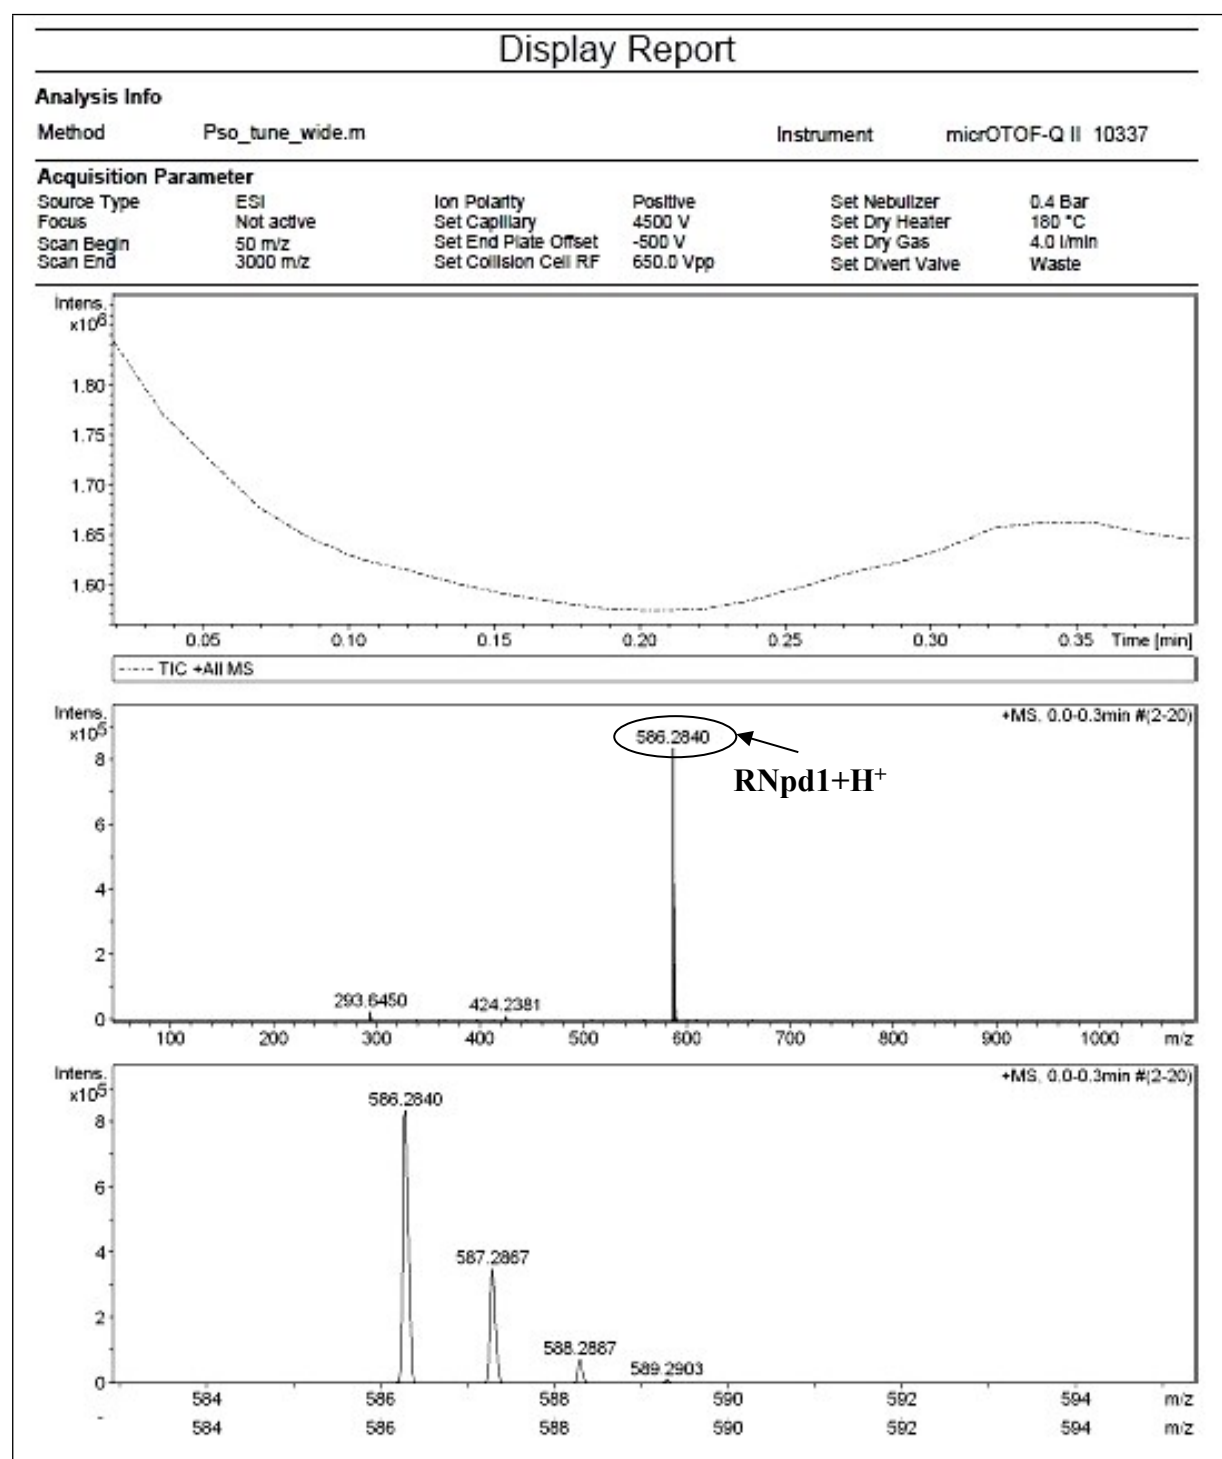

## Mass spectrum of RNpd1:Hg<sup>2+</sup> complex

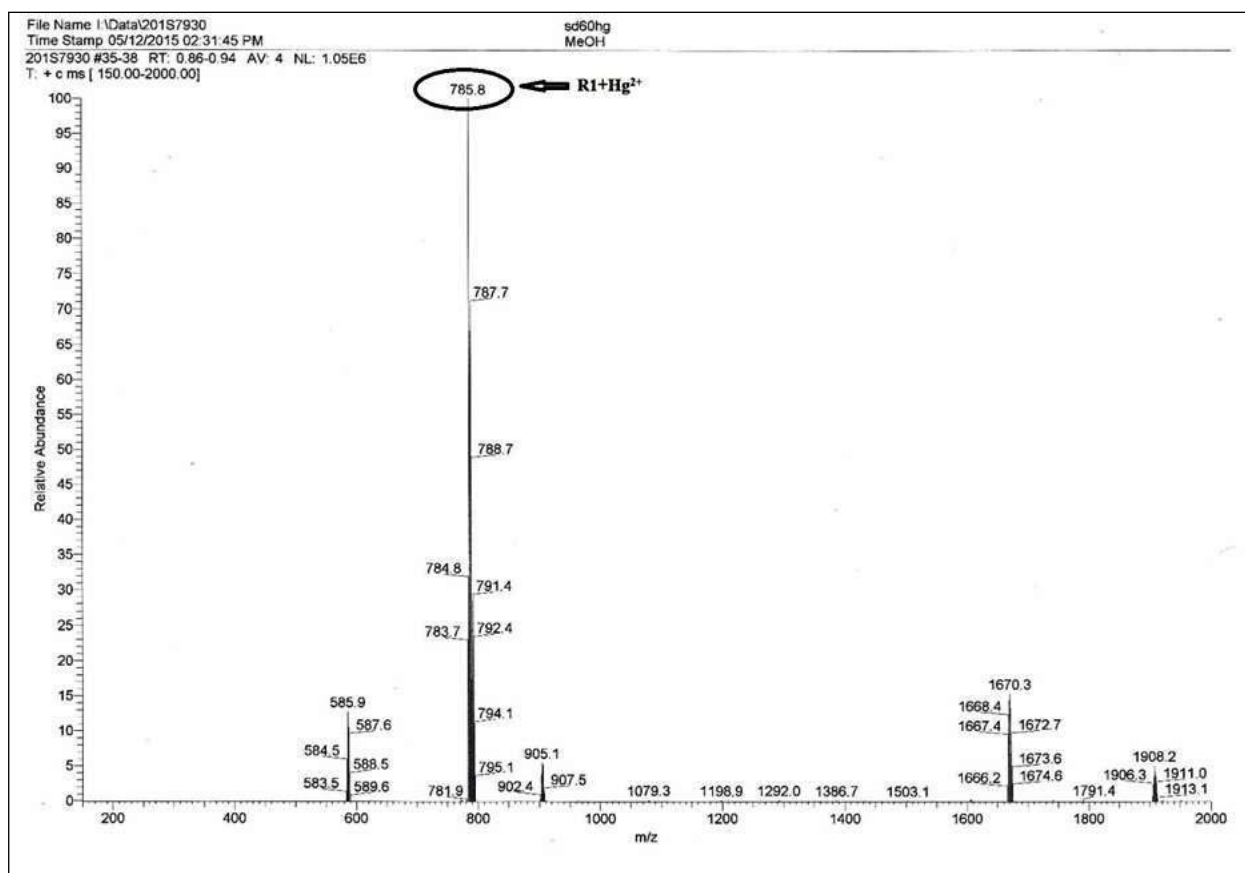

## Mass spectrum of RNpd1:UA complex

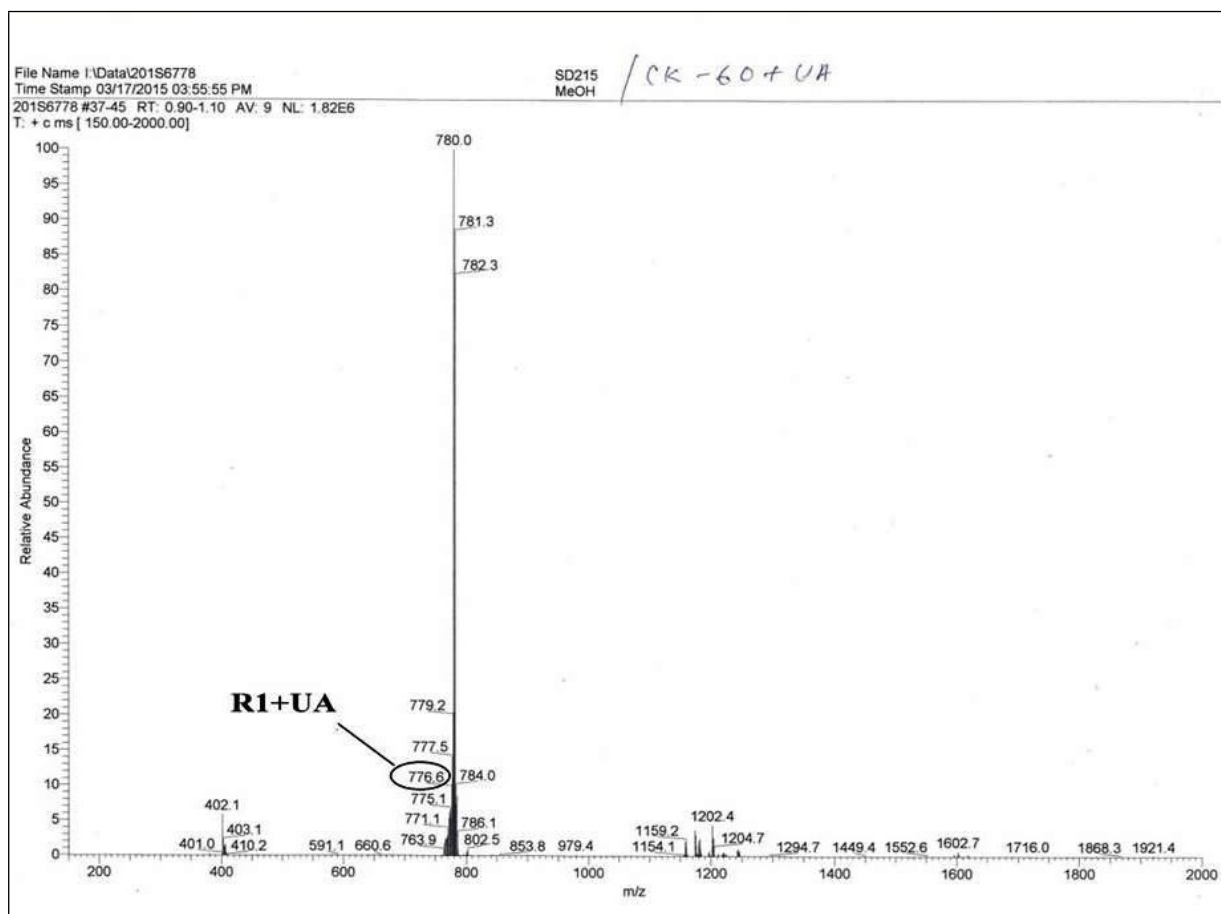

### Visual change of RNpd1 with different metal ions

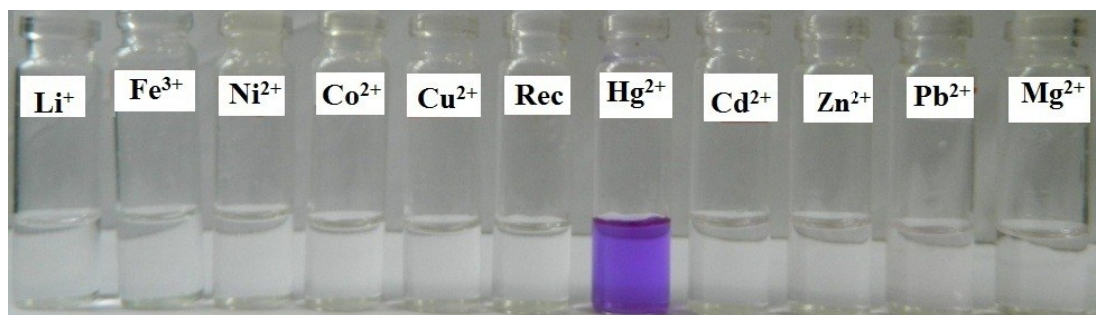

**Fig. S2** Visual colour change of **RNpd1** (10  $\mu$ M) with different metal ions ( $\text{Li}^+$ ,  $\text{Fe}^{3+}$ ,  $\text{Ni}^{2+}$ ,  $\text{Co}^{2+}$ ,  $\text{Cu}^{2+}$ ,  $\text{Hg}^{2+}$ ,  $\text{Cd}^{2+}$ ,  $\text{Zn}^{2+}$ ,  $\text{Pb}^{2+}$ ,  $\text{Mg}^{2+}$ ) in pH 7.0 phosphate buffer/ $\text{CH}_3\text{OH}$  (1:2, v/v).

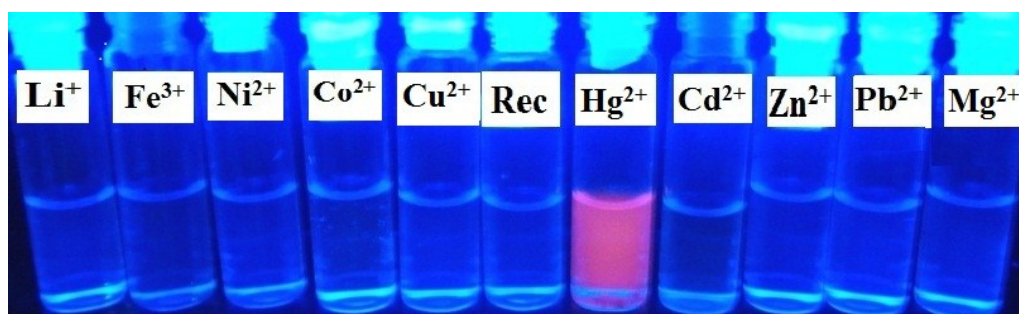

**Fig. S3** Visual fluorescence change under long wavelength UV light of **RNpd1** (10  $\mu$ M) with different metal ions ( $\text{Li}^+$ ,  $\text{Fe}^{3+}$ ,  $\text{Ni}^{2+}$ ,  $\text{Co}^{2+}$ ,  $\text{Cu}^{2+}$ ,  $\text{Rec}$ ,  $\text{Hg}^{2+}$ ,  $\text{Cd}^{2+}$ ,  $\text{Zn}^{2+}$ ,  $\text{Pb}^{2+}$ ,  $\text{Mg}^{2+}$ ) in pH 7.0 phosphate buffer/ $\text{CH}_3\text{OH}$  (1:2, v/v).

### Binding constant calculation by UV-Vis and fluorescence titration method using linear regression analysis

The reciprocal of intensity difference ( $1/\Delta I$ ), where  $\Delta I = (I - I_0)$ , was plotted against the reciprocal of concentration of guest ( $1/[G]$ ) for the calculation of association constant ( $K_a$ ) using Benesi-Hildebrand linear regression analysis following equation (i) where association constant  $K_a = \text{intercept/slope}$ .

$$1/(I - I_0) = 1/(I_\infty - I_0)K_a[G] + 1/(I_\infty - I_0) \quad \text{..... eqn. (i)}$$

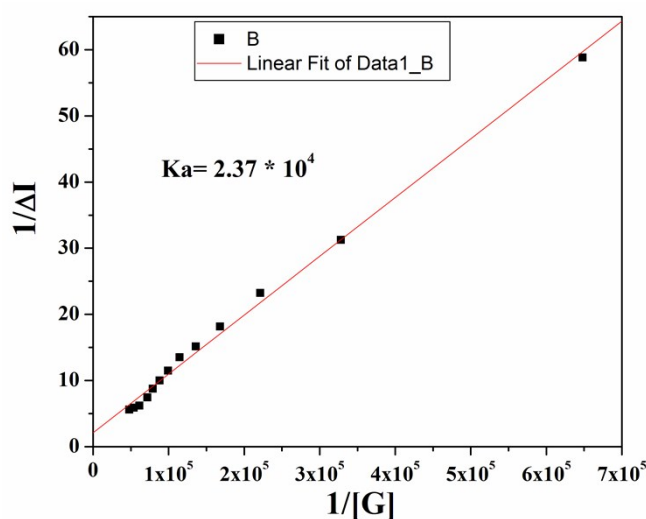

**Fig. S4** Binding constant calculation graph of **RNpd1** with **Hg<sup>2+</sup>** using UV-vis titration.

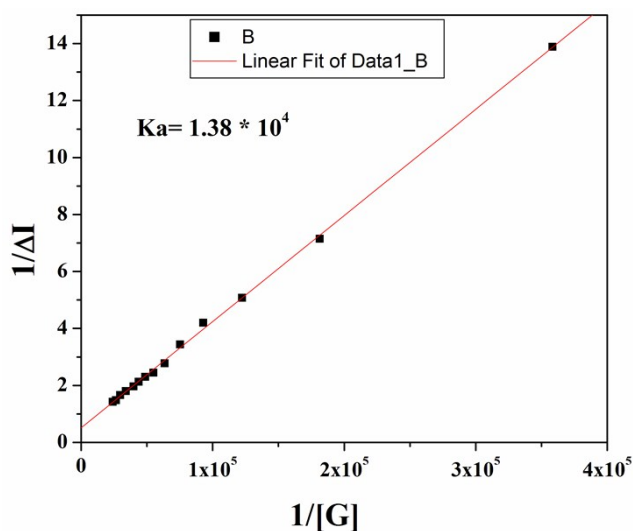

**Fig. S5** Binding constant calculation graph of **RNpd1** with **UA** using UV-vis titration.

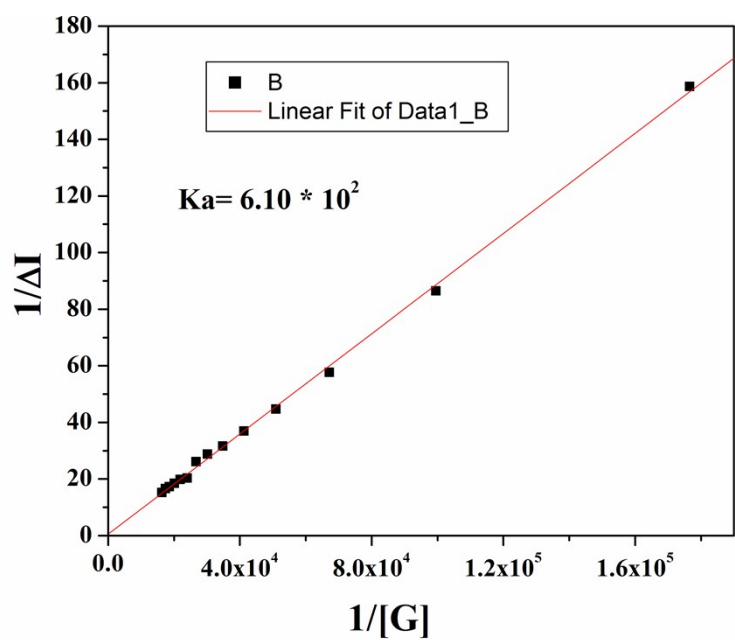

**Fig. S6** Binding constant calculation graph of RNpd1 with **adenine** using UV-vis titration.

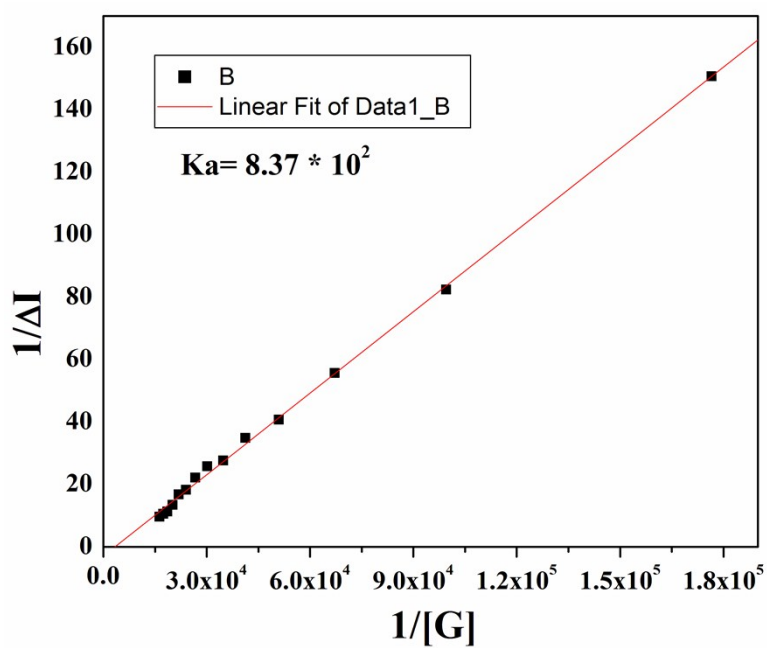

**Fig. S7** Binding constant calculation graph of RNpd1 with **guanine** using UV-vis titration.

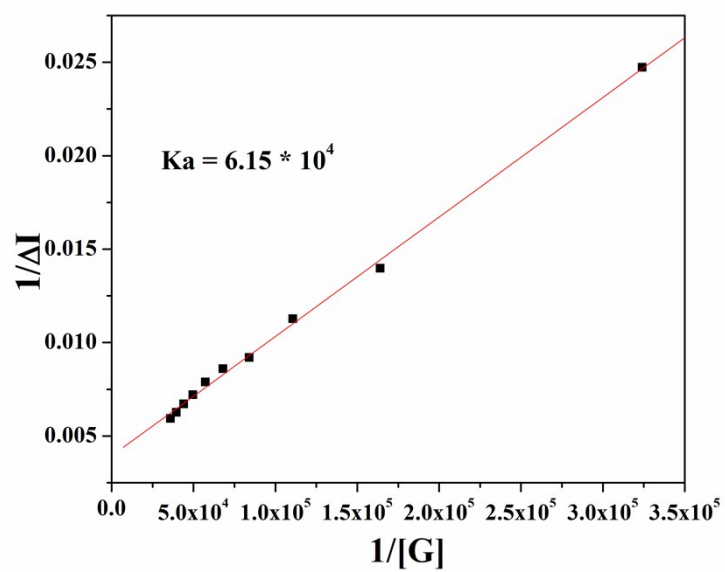

**Fig. S8** Binding constant calculation graph of **RNpd1** with **Hg<sup>2+</sup>** using fluorescence titration.

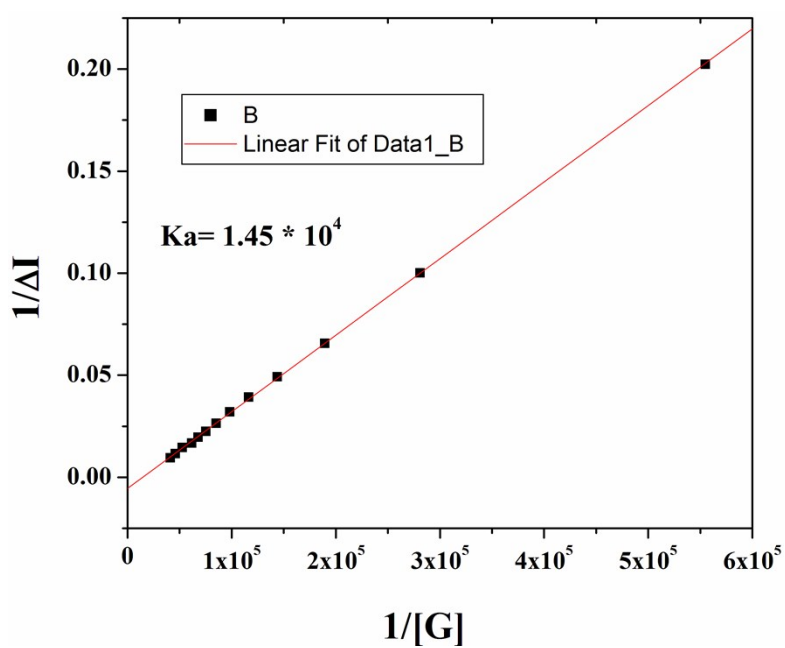

**Fig. S9** Binding constant calculation graph of **RNpd1** with **UA** using fluorescence titration.

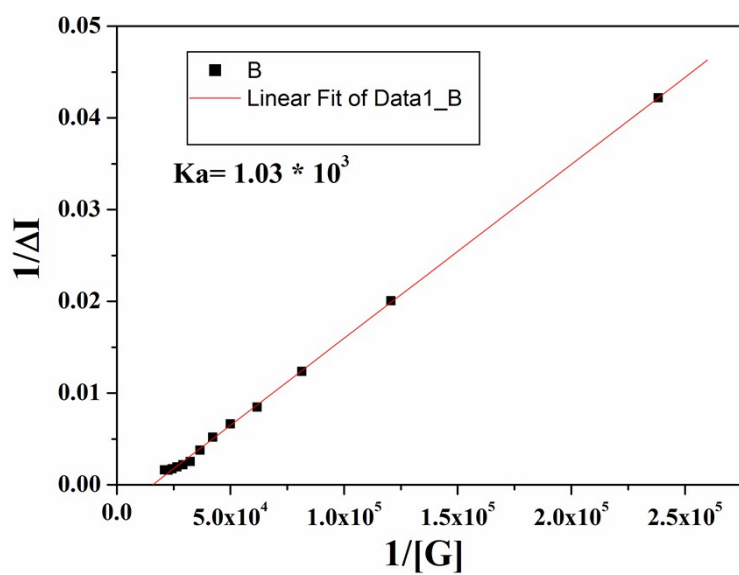

**Fig. S10** Binding constant calculation graph of **RNpd1** with adenine using fluorescence titration.

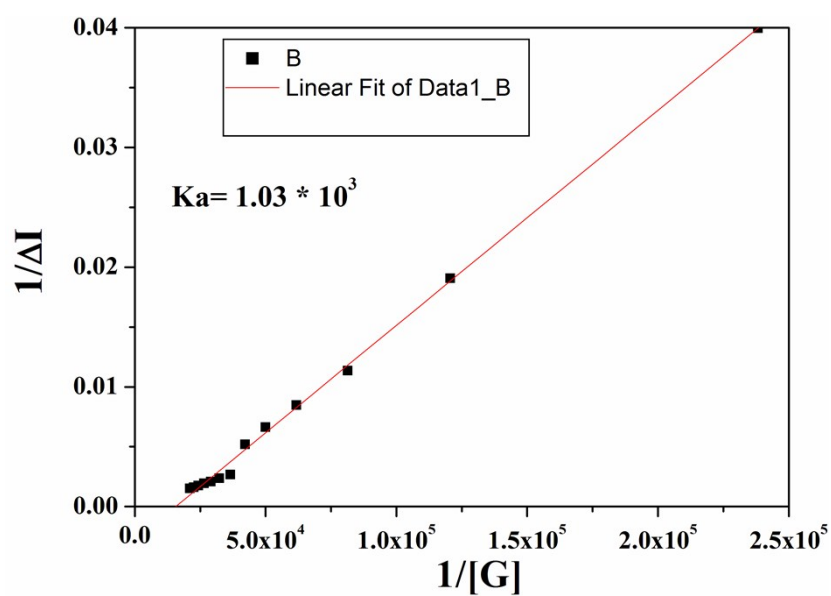

**Fig. S11** Binding constant calculation graph of **RNpd1** with guanine using fluorescence titration.

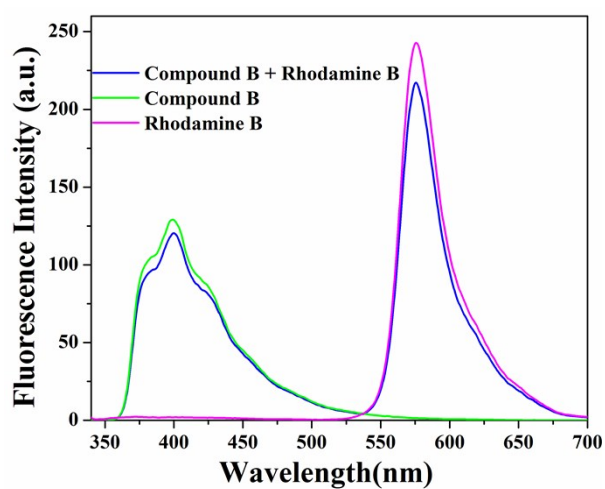

**Fig. S12** Comparison of Fluorescence spectra of comp B and Rhodamine B in pH 7.0 phosphate buffer/CH<sub>3</sub>OH (1:2, v/v).

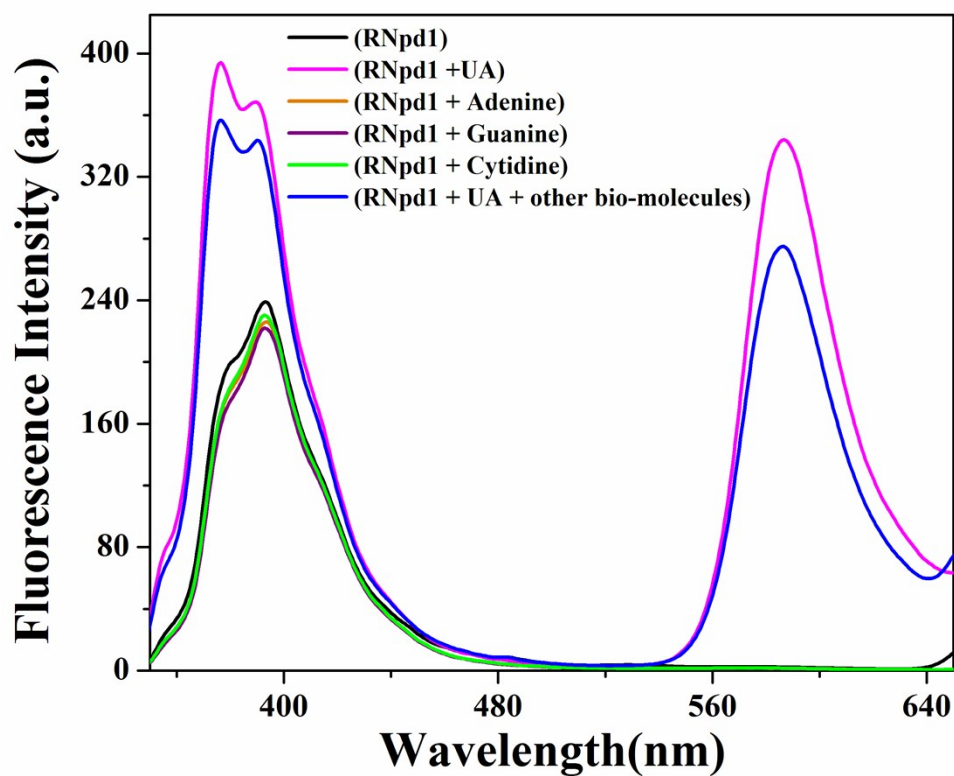

**Fig. S13** Competitive Fluorescence spectra of RNpd1 with UA and other biomolecules in pH 7.0 phosphate buffer/CH<sub>3</sub>OH (1:2, v/v).

### Quantum yield calculation:

Fluorescence quantum yields ( $\Phi$ ) were calculated using Equation given below (1) (Wu, D.; Huang, W.; Duan, C.; Lin, Z.; Meng, Q. *Inorg. Chem.* **2007**, *46*, 1538) using Rhodamine B ( $\Phi_f = 0.49$  in ethanol) as standards.

$$\Phi_u = \Phi_s \times \frac{I_u}{I_s} \times \frac{A_s}{A_u} \times \left( \frac{\eta_u}{\eta_s} \right)^2$$

Where  $\Phi_u$  and  $\Phi_s$  are the fluorescence quantum yields of the sample and standard,  $I_u$  and  $I_s$  are the integrated emission intensities of the sample and standard,  $A_u$  and  $A_s$  are the absorbance of the sample and standard at the excitation wavelength (568 nm), and  $\eta_u$  and  $\eta_s$  are the refractive indices of the sample and standard solutions, respectively.

**Table S2:** Quantum yield calculation and molar extinction coefficient value

|                              | $\lambda_{\max}$<br>(Absorption) | $\lambda_{\max}$<br>(Emission) | Quantum<br>Yield | Molar<br>Extinction<br>coefficient |
|------------------------------|----------------------------------|--------------------------------|------------------|------------------------------------|
| <b>RNpd1</b>                 | 328                              | 380                            | 0.017            | 3.26                               |
| <b>RNpd1:Hg<sup>2+</sup></b> | 568                              | 617                            | 0.353            | 5.86                               |
| <b>RNpd1:UA</b>              | 561                              | 582                            | 0.251            | 4.95                               |

### Calculation of limit of detection (LOD):

The detection limit of **RNpd1** with **Hg<sup>2+</sup>** and **UA** were calculated on the basis of fluorescence titration data. To determine the standard deviation for the fluorescence intensity, the emission intensity of the individual receptors without any anion was measured by 10 times and the standard deviation of blank measurements was calculated. The limit of detection (LOD) of the receptor for sensing **Hg<sup>2+</sup>** and **UA** were determined from the following equation:

$$\text{LOD} = K \times \text{SD}/S$$

Where  $K = 2$  or  $3$  (we take  $3$  in this case);  $\text{SD}$  is the standard deviation of the blank receptor (**RNpd1**) solution;  $S$  is the slope of the calibration curve.

### For RNpd1 with $\text{Hg}^{2+}$ :

From the linear fit graph we get slope =  $1.64 \times 10^8$ , and SD value is 0.51. Thus using the above formula we get the Limit of Detection =  $9.32 \times 10^{-9}$  M i.e. **RNpd1** can detect  $\text{Hg}^{2+}$  up to this very lower concentration by fluorescence techniques.

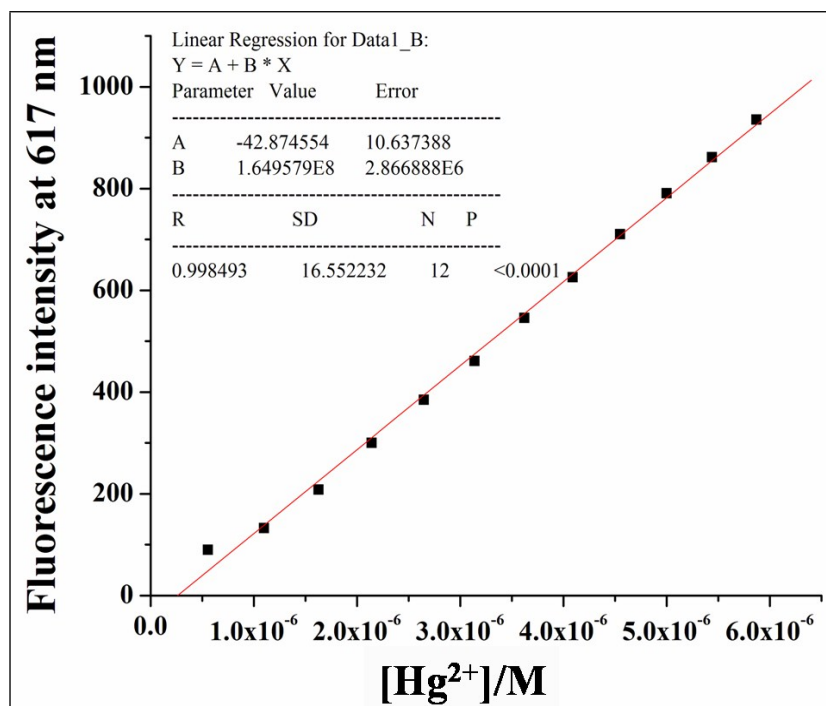

### For RNpd1 with UA:

From the linear fit graph we get slope =  $9.90 \times 10^7$ , and SD value is 0.51. Thus using the above formula we get the Limit of Detection =  $1.54 \times 10^{-8}$  M i.e. **RNpd1** can detect **UA** up to this very lower concentration by fluorescence techniques.

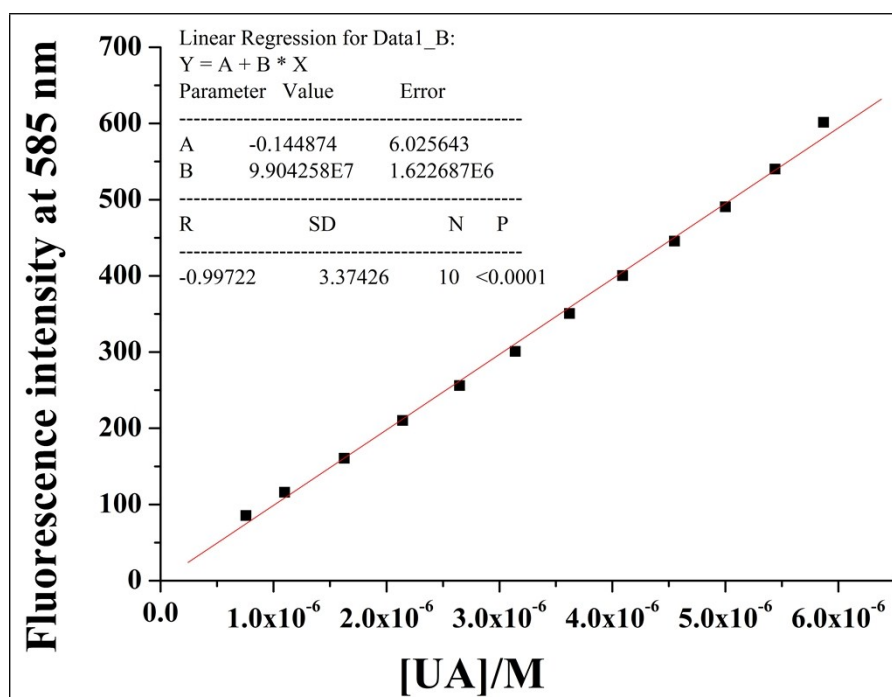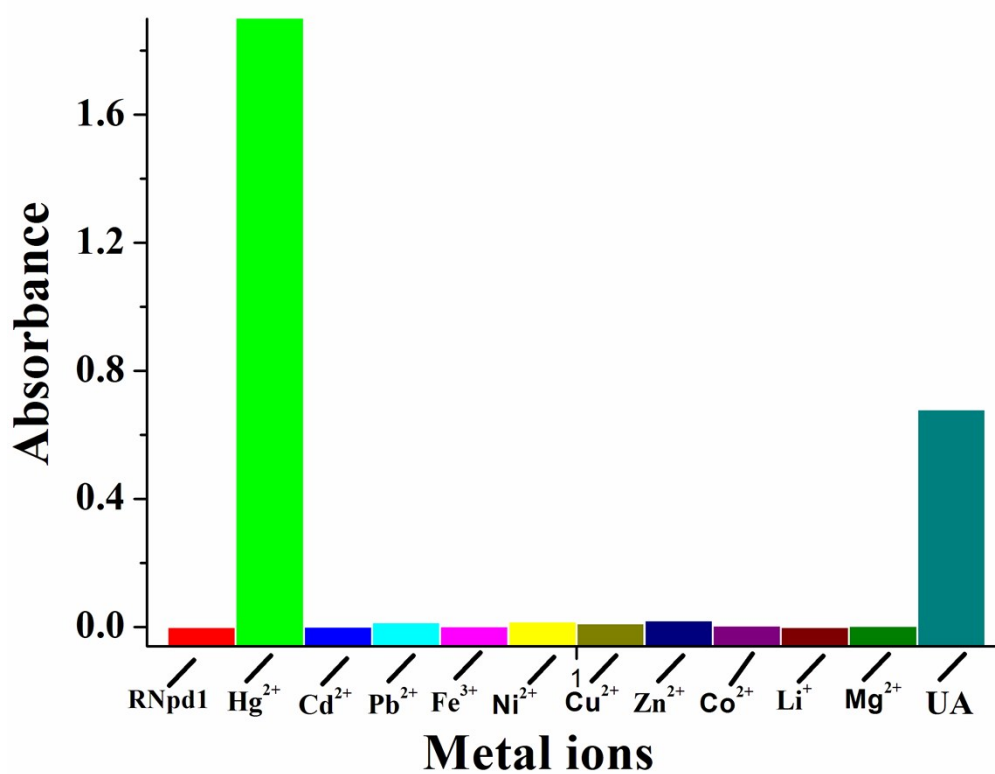

**Fig. S14** Bar diagram of RNpd1 with different metal ions and Uric acid in pH 7.0 phosphate buffer/CH<sub>3</sub>OH (1:2, v/v).

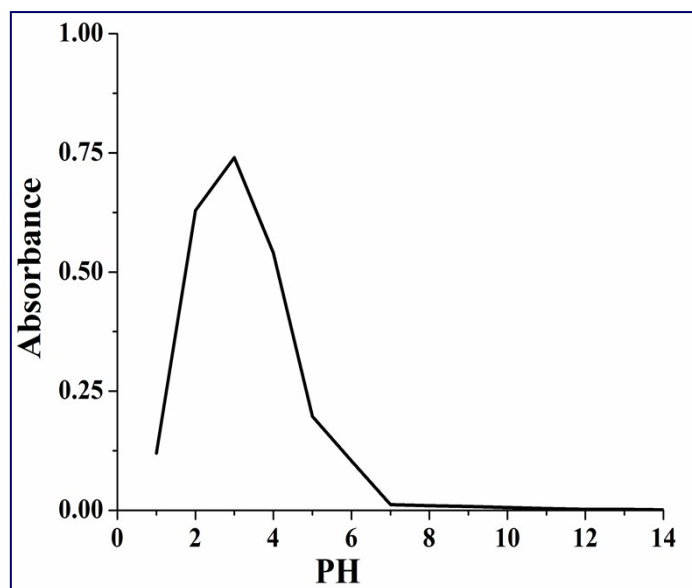

**Fig. S15** Influence of pH in absorbance of **RNpd1** (558 nm) in pH 7.0 phosphate buffer/CH<sub>3</sub>OH (1:2, v/v).

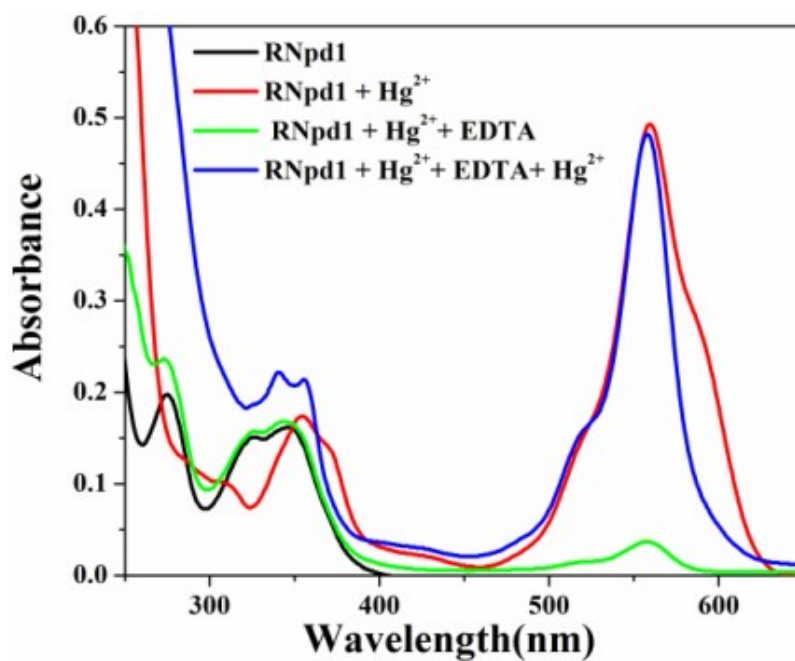

**Fig. S16** Reversibility of **RNpd1:Hg<sup>2+</sup>** complex with EDTA in pH 7.0 phosphate buffer/CH<sub>3</sub>OH (1:2, v/v).
